# Supplementary material
Source: publisher figshare collection journal article supplement (https://acs.figshare.com/ndownloader/files/8972611)
Supplement: Supplementary file 1 [file 8972611]

# **Supplementary Information**

## **Fast, Sensitive and Quantitative Point-of-Care Platform for the Detection of Drugs of Abuse in Urine, Serum and Whole Blood**

Ying Li, Uvaraj Uddayasankar, Bangshun He, Ping Wang,\* Lidong Qin\*

---

**\*Corresponding author**

Email: [lqin@houstonmethodist.org](mailto:lqin@houstonmethodist.org)

[ping.wang2@uphs.upenn.edu](mailto:ping.wang2@uphs.upenn.edu)

The supplementary information includes:

## **Methods**

**Figure S1.** Design of the integrated CV-Chip.

**Figure S2.** Plastic-based 6-plexed integrated CV-Chip with tracks.

**Figure S3.** Procedures for the glass modification antibody coating.

**Figure S4.** Comparison of the performance of epoxy- and aldehyde- modified glass surface for the coating of mouse anti-cocaine antibody.

**Figure S5.** Average size of the cocaine-BSA, PtNP and cocaine-BSA-PtNP conjugate, measured by DLS.

**Figure S6.** Test result of two samples spiked in PBS, urine and serum on the integrated CV-Chip.

**Figure S7.** Calibration curves for cocaine, amphetamine and methamphetamine in urine.

**Figure S8.** Calibration curves for benzodiazepine, opiate and THC in urine.

**Figure S9.** Blood collection from finger-prick.

**Table S1.** The abbreviation and cutoff value in urine and serum of the seven abused drugs.

**Table S2.** Comparison of assay time on the previous CV-Chip and the integrated CV-Chip.

**Table S3.** LC-MS data for cocaine in the 10 urine serum samples obtained from ARUP laboratories and the on-chip result for these samples.

**Table S4.** LC-MS data for benzodiazepine metabolites in the 10 urine samples obtained from ARUP laboratories and the on-chip results.

**Table S5.** LC-MS data for the 8 patient urine.

**Table S6.** Data for methadone or metabolite in the 10 patient serum samples.

**Table S7.** A comparison between the on-chip results and the LC-MS method for all the tested samples.

**Movie S1** Time-lapse recording of bubbles induced by nitrogen gas generated from the reaction of luminol and  $\text{H}_2\text{O}_2$ , with HRP as the catalyst.

**Movie S2** Time-lapse recording of bubbles induced by oxygen gas generated from the decomposition of  $\text{H}_2\text{O}_2$ , with PtNPs as the catalyst.

## Methods

### A. Comparison of aldehyde- and epoxy- modified glass surface for antibody coating.

We compared the performance of the aldehyde- and epoxy- modified glass surface by using anti-cocaine antibody. After the bottom plate underwent surface treatment, 2  $\mu$ L of the mouse anti-cocaine antibody ( $\sim 10$   $\mu$ g/mL) was added to the ELISA wells and incubated overnight at 4°C. After washing three times with PBS buffer containing 0.05% Tween, the wells were blocked with 5% BSA in PBS for 1h. Then 2  $\mu$ L of the FITC-conjugated, anti-mouse IgG secondary antibody was added to the wells and fluorescence images were taken. We also scratched antibody-coated surface with a pipette tip to confirm the coating performance.

### B. Conjugation of platinum nanoparticles (PtNPs) to drug-BSA.

PtNPs were prepared using a method similar to previously reported methods.<sup>1</sup> The size distribution of PtNPs was characterized by dynamic light scattering (DLS; Malvern Zetasizer Nano Series, Malvern, UK). The average size of the PtNPs synthesized was  $\sim 28$  nm (Figure S5a).

Immunoassay-based drug detection is always using competitive ELISA, in which the drug-derivate competes with the target drug to bind to the coated antibody on the surface. In conventional ELISA, drug-HRP is always used as the drug-derivate. Here, we change HRP to PtNP, which can efficiently catalyze  $H_2O_2$  to generate oxygen.<sup>2</sup> To adapt PtNPs to the detection of drugs of abuse, we conjugated PtNPs to the drug-BSA derivate. Drug-BSA is commercially available in Fitzgerald (MA, USA) for all the target drugs we tested. Twenty microliter drug-BSA solution (1 mg/mL) was mixed with 180  $\mu$ L PtNP solution (1 mg/mL, dissolved in PBS) and incubated with shaking at 800 rpm for 2h. After that, bovine serum albumin (BSA) was added to a final concentration of 1% to block the surface of the PtNPs, and the unconjugated

antibody was removed using a centrifugal filter. Finally, the drug-BSA-PtNPs were suspended in 200  $\mu$ L of 10 mM PBS, pH 7.4, containing 0.1% Triton X-100, 5% sucrose, and 1% BSA.<sup>3</sup> During the conjugation, BSA bound to the surface of PtNPs by the cleavage of the sulfur-sulfur bond in disulfides through oxidation.<sup>4</sup> This conjugation is based on covalence, so it is very stable. We used DLS to measure the average diameter of cocaine-BSA, PtNP and PtNP-conjugated cocaine-BSA.

### **C. Device reuse.**

To reuse the device, we detach the device to two plates and use wipers to clean the oil/ reagents with ethanol/isopropanol after the assay. Then the two plates are treated with ultrasonic (put the two plates in a beaker with Millipore water) for 2 min. The devices are then thoroughly washed with Millipore water and dried with nitrogen gas.

### **D. Comparison of catalytic capability between PtNPs and HRP.**

For PtNPs, 2  $\mu$ L H<sub>2</sub>O<sub>2</sub> (35%, w/v) and 2  $\mu$ L PtNPs (0.1 nM) were mixed on a glass slide by using pipette; then time-lapse imaging of bubbles induced by oxygen gas was conducted. For HRP, luminol (35 mM, dissolved in 0.1 M sodium carbonate buffer, pH11.0) were mixed with 35% (w/v) H<sub>2</sub>O<sub>2</sub> at 1:1 volume-to-volume ratio; then 2  $\mu$ L luminol-H<sub>2</sub>O<sub>2</sub> solution and 2  $\mu$ L HRP (1 nM) were mixed on a glass slide by using pipette; and then time-lapse imaging of bubbles induced by nitrogen gas was conducted. Though the concentration of PtNP was 10-fold lower than that of HRP, the produced bubbles from PtNPs/ H<sub>2</sub>O<sub>2</sub> were much more than that from HRP/ luminol-H<sub>2</sub>O<sub>2</sub>.

**E. Antibody selection and cross talk check.** We purchased at least two antibodies (one monoclonal antibody and one polyclonal antibody) for each drug and the antibody crossing

reactivity for the targeted drugs was validated using conventional ELISA before applied to the on-chip assay. Those antibodies without cross reactivity were chosen for the on-chip assay.

#### **F. Evaluation of potential hemolysis.**

To evaluate the influence of potential hemolysis, we spiked cocaine to the blood obtained from a drug-free volunteer to make a sample with a concentration of 300 ng/mL. We then injected the plasma (obtained through centrifugation of the blood sample) on the top end of the device (pre-coated with cocaine antibody and the drug derivate), and injected the plasma (obtained through microfiltration of the same blood sample) to the bottom end. During the loading, we didn't find apparent hemolysis (based on the color of the plasma in the well). After the on-chip assay, no readable ink bar-chart was formed on the device for the six parallel channels (the distance is  $\sim 0$ ). These results demonstrated that there is no hemolysis during the filtration or very minimal hemolysis that doesn't bring significant influence on the assay because of the efficient washing of the washing buffer, which washes away the minimal leaked enzymes/proteins (such as hemoglobin) before they contact with  $H_2O_2$ .

**G. Collection of clinical samples.** This project for drugs of abuse detection was approved by the Institutional Review Board (IRB) at Houston Methodist Hospital (Houston, TX). Twenty-eight de-identified urine samples and twelve de-identified serum samples were obtained from the clinical laboratory and Associated Regional and University Pathologists, Inc. (ARUP laboratories, Salt Lake City, Utah) after clinical testing has been completed. Blood samples from drug-free volunteers were drawn in the clinical laboratory of Houston Methodist Hospital. Finger-prick blood samples from the drug-free volunteers were obtained by using contact-activated lancets (BD, Catalogue # 366594).

## References

1. Huang, M.H. et al. Designed nanostructured Pt film for electrocatalytic activities by underpotential deposition combined chemical replacement techniques. *J Phys Chem B* **109**, 15264-15271 (2005).
2. Song, Y., Xia, X., Wu, X., Wang, P. & Qin, L. Integration of platinum nanoparticles with a volumetric bar-chart chip for biomarker assays. *Angew Chem Int Ed Engl* **53**, 12451-12455 (2014).
3. Lin, H.C., Wang, I.L., Lin, H.P., Chang, T.C. & Lin, Y.C. Enhancement of an immunoassay using platinum nanoparticles and an optical detection. *Sensor Actuat B-Chem* **154**, 185-190 (2011).
4. Hakkinen, H. The gold-sulfur interface at the nanoscale. *Nat Chem* **4**, 443-455 (2012).

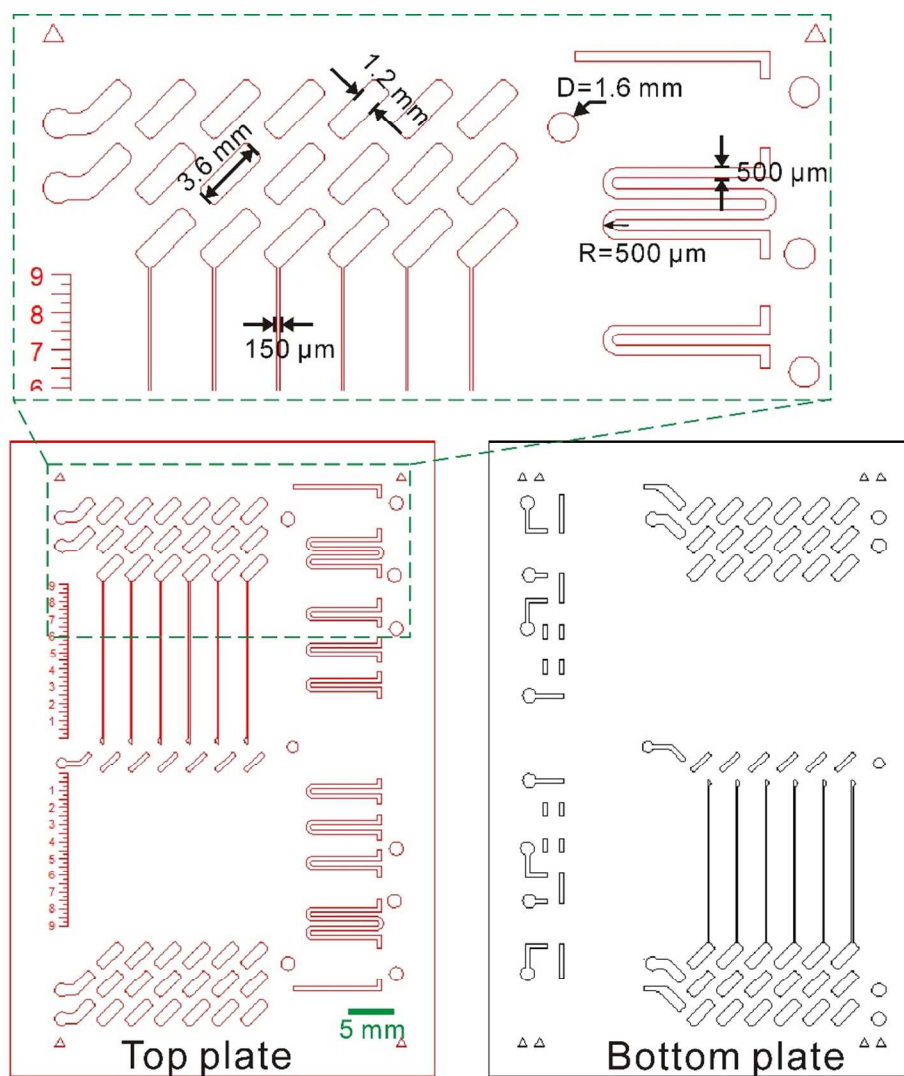

**Figure S1** Design of the integrated CV-Chip. The top plate and bottom plate are shown in red and black, respectively. The enlarged view showed the size details for the wells and channels.

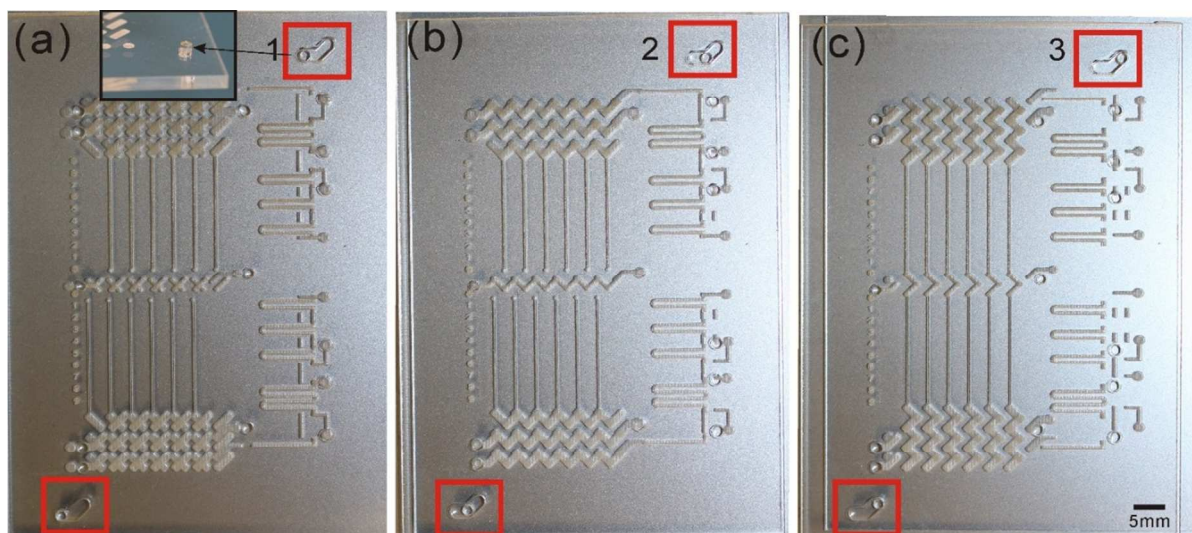

**Figure S2** Plastic-based 6-plexed integrated CV-Chip with tracks. (a-c) The three status of the device during the operation. Red rectangles highlight the track designs. Track was fabricated on the top plate. 1, 2 and 3 indicate the positions of the cylinder on the bottom plate (the inset in a) in the three status. This plastic-based device was fabricated by using laser cutter/engraving system (Universal Laser Systems, Arizona).



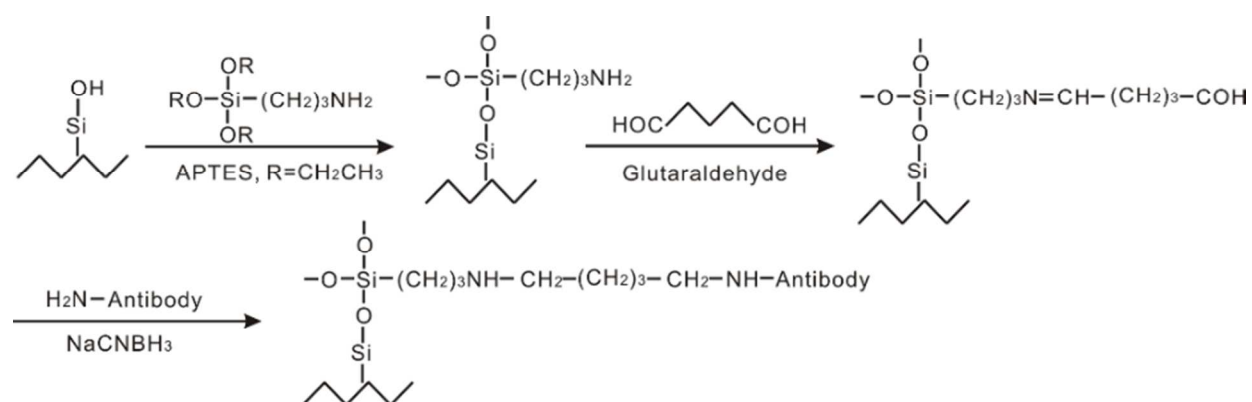

**Figure S3** Procedures for the glass modification antibody coating.

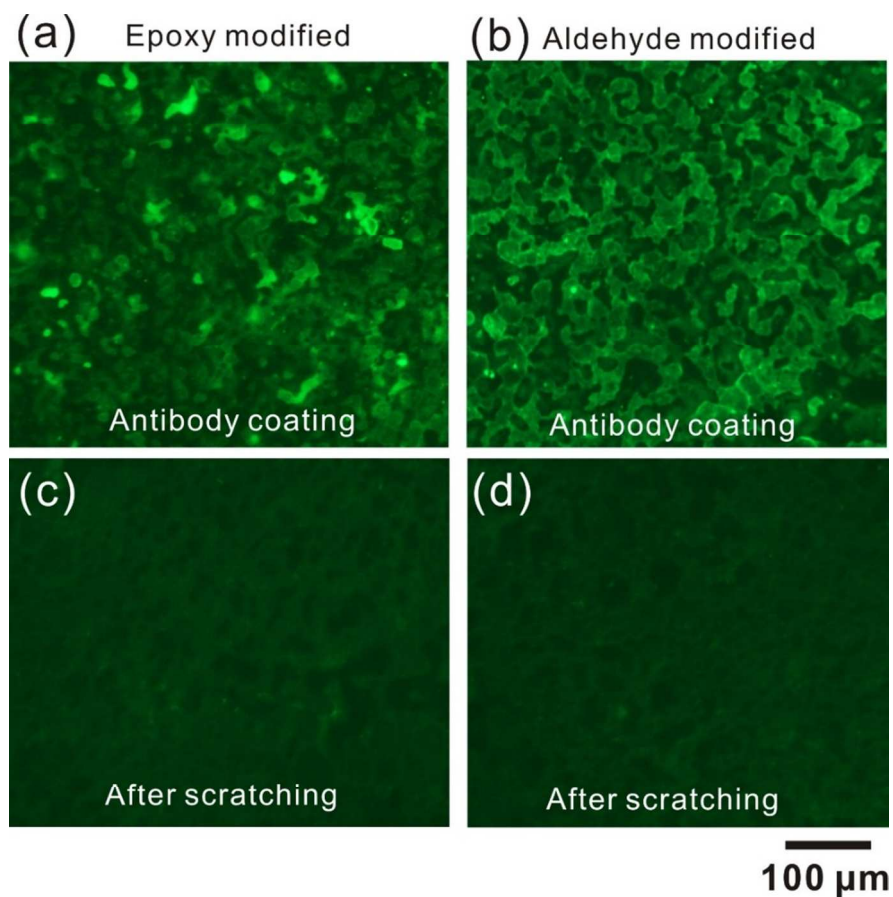

**Figure S4** Comparison of the performance of epoxy- and aldehyde- modified glass surface for the coating of mouse anti-cocaine antibody. (a, b) Fluorescence of the FITC-conjugated, anti-mouse IgG secondary antibody on the epoxy (a) and aldehyde (b) modified surface. (c, d) The surface in a and b after scratched using a pipette tip.

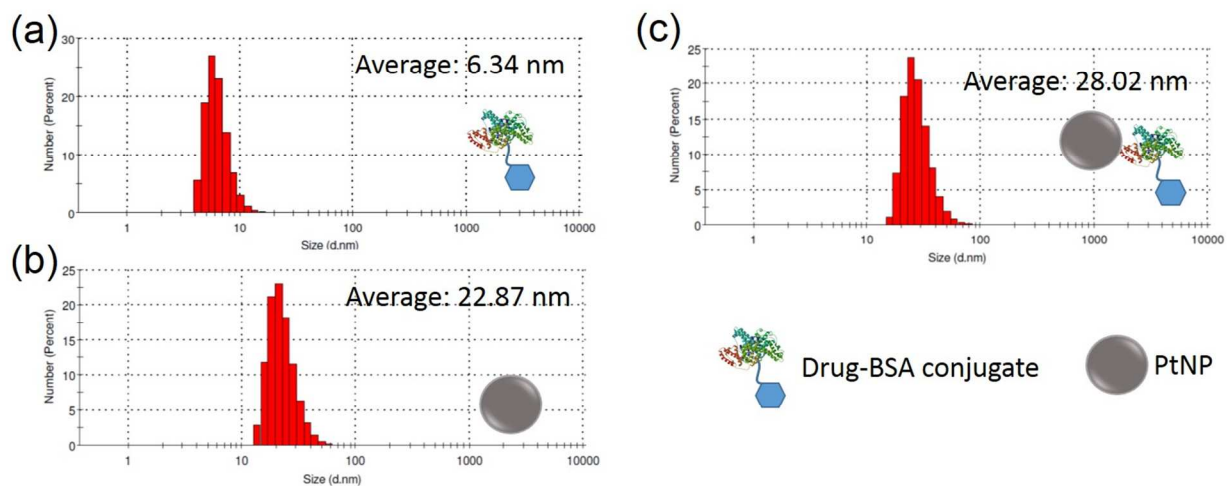

**Figure S5** Average size of the cocaine-BSA (a), PtNP (b) and cocaine-BSA-PtNP conjugate (c), measured by dynamic light scattering (DLS). The results showed that the size of PtNP increased by 5.15 nm after the conjugation, which confirmed the success of the conjugation.

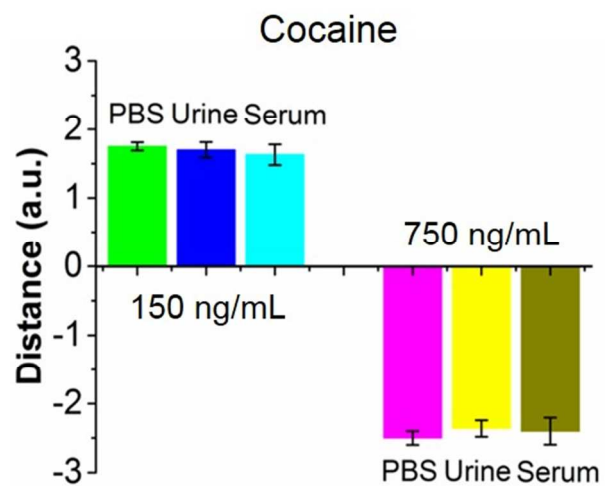

**Figure S6** Test result of two samples (150 and 750 ng/mL) spiked in PBS, urine and serum on the integrated CV-Chip. This result demonstrated that the complex matrix provided little or no interference with the performance of the device.

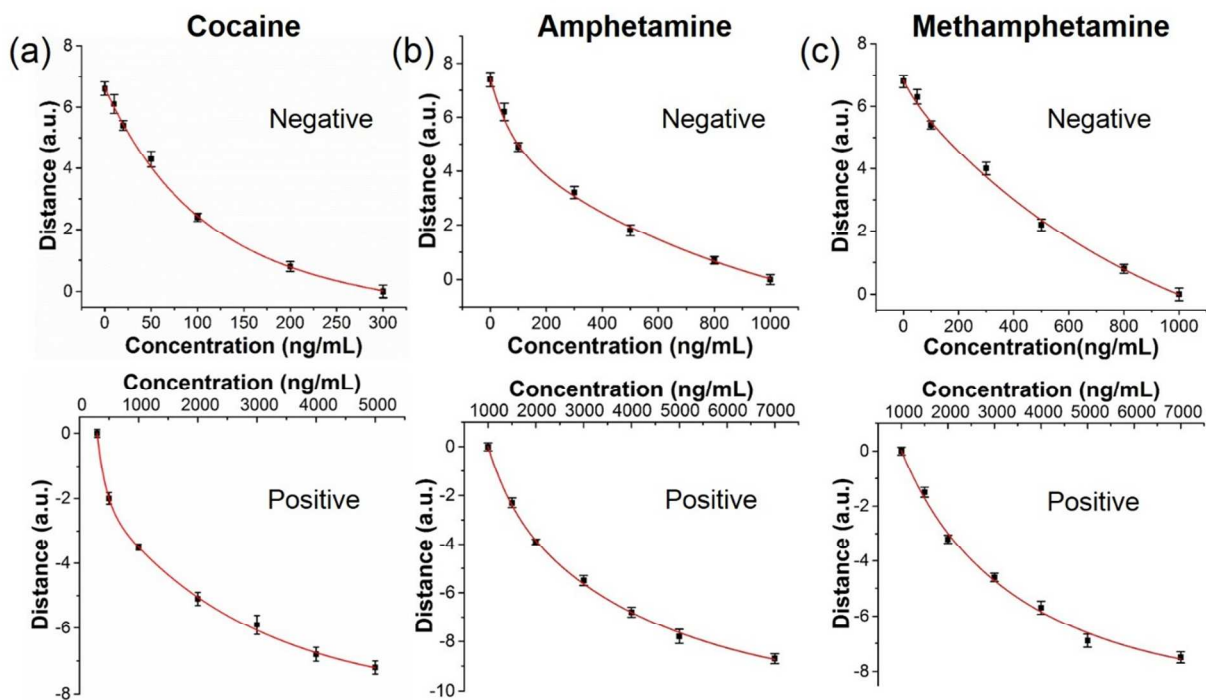

**Figure S7** Calibration curves for cocaine (a), amphetamine (b) and methamphetamine (c) for negative and positive urine samples. Cutoff values used for cocaine, amphetamine and methamphetamine is 300, 1000 and 1000 ng/mL, respectively.

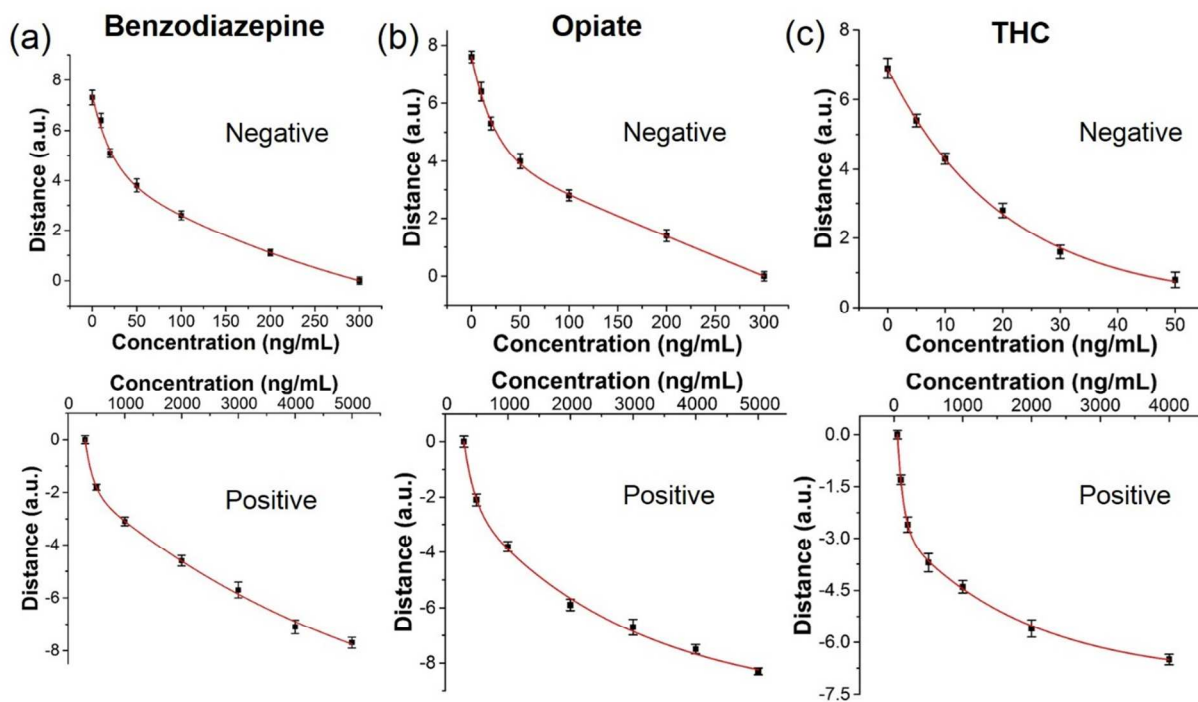

**Figure S8** Calibration curves for benzodiazepine (a), opiate (b) and THC (c) for negative and positive urine samples. Cutoff values used for benzodiazepine, opiate and THC is 300, 300 and 50 ng/mL, respectively.

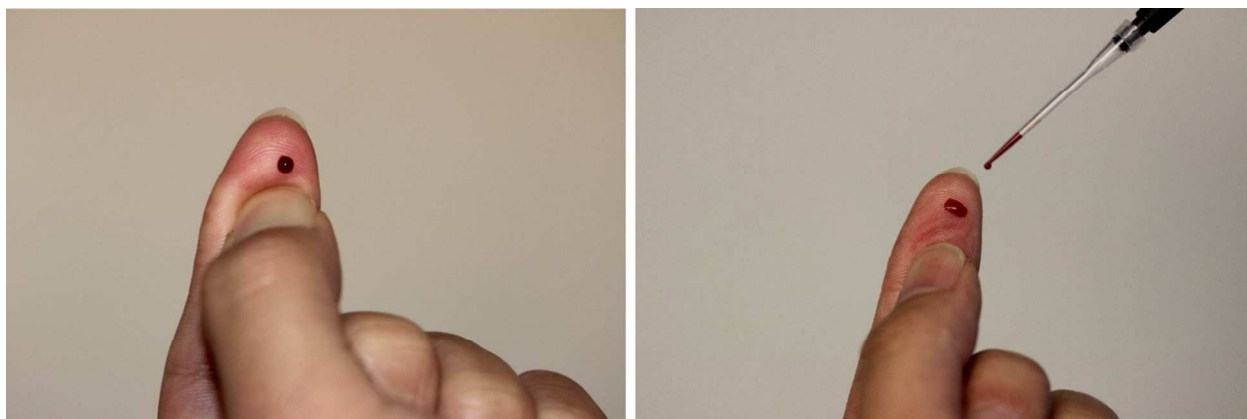

**Figure S9** Blood collection from finger-prick. About 20  $\mu\text{L}$  blood can be obtained in one finger-prick.

**Table S1** The abbreviation and cutoff value in urine and serum of the seven abused drugs. For the cut-off values in urine, we chose them based on those widely used in most drug screening kits (such as Alere Triage® TOX Drug Screen). The cutoff values in serum were chosen in reference of those used by ARUP laboratories. Unit, ng/mL.

| <b>Drug name</b>             | Cocaine | Amphetamine | Methamphetamine | Benzodiazepine | Opiate | Tetrahydro - cannabinol | Methadone |
|------------------------------|---------|-------------|-----------------|----------------|--------|-------------------------|-----------|
| <b>Abbreviation</b>          | COC     | AMP         | mAMP            | BZO            | OPI    | THC                     | MTD       |
| <b>Cutoff value in urine</b> | 300     | 1000        | 1000            | 300            | 300    | 50                      | 300       |
| <b>Cutoff value in serum</b> | 30      | 30          | 30              | 75             | 30     | 30                      | 40        |



**Table S2** Comparison of assay time on the previous CV-Chip and the integrated CV-Chip. The total on-site assay time of the integrated CV-Chip is significantly reduced due to the integrated channels and the improved sensitivity (e.g., surface modification and ELISA probe).

| ELISA                      | Pre-prepared     |         |          |         |                       |         |            | On-site assay                        |         |         |                      |                          |
|----------------------------|------------------|---------|----------|---------|-----------------------|---------|------------|--------------------------------------|---------|---------|----------------------|--------------------------|
|                            | Antibody coating | Washing | Blocking | Washing | Drug derivate binding | Washing | Assembling | Loading sample and Biomarker binding | Washing | silding | Reaction and Readout | Total on-site assay time |
| Previous CV-Chip           | 1h at RT         | 2 min   | 1h at RT | 2 min   | 1h at RT              | 2 min   | 2 min      | 1.5 h                                | 2 min   | 10 s    | 15 min at 37 °C      | ~107 min                 |
| Current integrated CV-Chip | 1h at RT         | 2 min   | 1h at RT | 2 min   | 1h at RT              | 2 min   | 2 min      | 5 min                                |         |         | 5 min at RT          | 10 min                   |

RT represents room temperature.

**Table S3** LC-MS/MS data for cocaine in the 10 urine samples obtained from ARUP laboratories and the on-chip data. Unit for the data is ng/mL.

| Sample | Cocaine | Age | Sex | On-chip result |
|--------|---------|-----|-----|----------------|
| 1      | 200     | 73  | F   | 342±19         |
| 2      | 292     | 27  | M   | 375±49         |
| 3      | 365     | 23  | F   | 331±23         |
| 4      | >5000   | 50  | F   | 5106±141       |
| 5      | >5000   | 48  | M   | 4890±214       |
| 6      | 2669    | 32  | M   | 2512±18        |
| 7      | 1796    | 72  | M   | 1630±123       |
| 8      | 270     | 34  | F   | 390±35         |
| 9      | 2808    | 27  | F   | 2608±261       |
| 10     | 4495    | 50  | F   | 4600±162       |

**Table S4** LC-MS/MS data for benzodiazepine/metabolites in the 10 urine samples obtained from ARUP laboratories and the on-chip results. Unit for the data is ng/mL.

| Sample # | Diaz Diaz | Oxaz  | Temaz | Nordiaz | Loraz | Alpraz | Clonaz | 7ACLON | Midaz | Chlordiaz | Age | Sex | On-Chip result |
|----------|-----------|-------|-------|---------|-------|--------|--------|--------|-------|-----------|-----|-----|----------------|
| 11       | <20       | >4000 | 2688  | 851     | <20   | 155    | 21     | 920    | <20   | <20       | 32  | F   | 4890±189       |
| 12       | <20       | 79    | 25    | <20     | <20   | 356    | <5     | <5     | <20   | <20       | 49  | F   | 316±23         |
| 13       | <20       | 863   | 934   | 923     | <20   | <5     | <5     | <5     | 66    | <20       | 42  | F   | 1580±112       |
| 14       | <20       | 380   | 136   | 70      | <20   | <5     | <5     | <5     | <20   | <20       | 49  | M   | 369±42         |
| 15       | <20       | <20   | <20   | <20     | 528   | <5     | <5     | <5     | <20   | <20       | 35  | F   | 480±71         |
| 16       | <20       | 437   | 194   | 76      | <20   | <5     | <5     | <5     | <20   | <20       | 17  | M   | 439±47         |
| 17       | <20       | 300   | 595   | 327     | <20   | <5     | <5     | <5     | <20   | <20       | 46  | F   | 632±56         |
| 18       | <20       | <20   | 320   | <20     | <20   | 48     | <5     | 47     | <20   | <20       | 21  | F   | 338±62         |
| 19       | <20       | 318   | 126   | 106     | <20   | <5     | <5     | <5     | <20   | <20       | 45  | M   | 413±51         |
| 20       | 33        | >4000 | >4000 | 2050    | <20   | 94     | <5     | <5     | <20   | <20       | 51  | F   | 4960±143       |

Diaz: Diazepam; Oxaz: Oxazepam; Temaz:Temazepam; Nordiaz:Nordiazepam; Loraz: Lorazepam; Alpraz :Alprazolam; Clonaz:Clonazepam; Chlordiaz:Chlordiazepoxide;7ACLON: 7-Amino Clonazepam; Midaz: Midazolam.

**Table S5.** LC-MS/MS data for the 8 patient urine samples. For clarity of presentation, positive samples are shown in red fonts. Unit for the data is ng/mL.

| Drugs                |                             |         | Samples |         |         |           |           |           |           |         |
|----------------------|-----------------------------|---------|---------|---------|---------|-----------|-----------|-----------|-----------|---------|
| Drug Class           | Items                       | Cut off | 21      | 22      | 23      | 24        | 25        | 26        | 27        | 28      |
| Cocaine              | Benzoylcegonine             | 50      | 16.5    | 6.2     | 352     | Sat       | 380       | Sat       | 365       | 1796    |
| Amphetamine          | Amphetamine                 | 50      | Sat *   | No peak | No peak | 0.10<br>2 | No peak   | 0.02      | 0.17      | No peak |
| Methamphetamine      | Methamphetamine             | 50      | Sat     | No peak | No peak | Sat       | <0        | 0.01<br>3 | <0        | 0.042   |
| Benzodiazepines      | 7-aminoclonazepam           | 10      | 4570    | 0.49    | 0.308   | <0        | 0.00<br>3 | 0.14<br>9 | <0        | 0.036   |
|                      | Lorazepamglucuronide        | 40      | 0.594   | <0      | 632     | <0        | 0.45      | <0        | 0.21<br>3 | 0.025   |
|                      | Oxazepamglucuronide         | 50      | <0      | 0.019   | 0.035   | 0.01<br>1 | 0.11      | 489       | 0.70<br>2 | <0      |
|                      | Clonazepam                  | 10      | 284     | 0.327   | 0.138   | 0.03      | 4.1       | 2.1       | 0.52<br>6 | <0      |
|                      | Temazepamglucuronide        | 20      | <0      | <0      | <0      | <0        | 0.37      | 0.06      | 0.04      | <0      |
| Opiates              | Codeine                     | 20      | 59.1    | <0      | 5.42    | 0.01      | No peak   | No peak   | 0.04<br>2 | 569     |
|                      | Codeine-6-glucuronide       | 20      | <0      | 3.69    | 0.77    | 1.52      | 0.29      | <0        | No peak   | <0      |
|                      | Hydrocodone                 | 20      | <0      | 325.9   | <0      | <0        | <0        | 0.13<br>2 | 0.34<br>5 | 1.18    |
|                      | Norhydrocodone              | 20      | 2130    | 207.3   | 0.39    | 324       | 0.06      | 0.13      | <0        | No peak |
|                      | Hydromorphone-3-glucuronide | 20      | 3210    | 42.8    | <0      | 2.56      | 0.37      | 0.06      | <0        | 5.80    |
|                      | Tramadol                    | 50      | <0      | No peak | 0.012   | Sat       | No peak   | No peak   | <0        | <0      |
|                      | O-Demethyl Tramadol         | 20      | <0      | No peak | No peak | 1.97      | <0        | 0.22      | 0.03      | 7.03    |
|                      | Morphine                    | 20      | 317     | No peak | <0      | No peak   | 0.19      | <0        | Sat       | <0      |
|                      | Morphine-3-glucuronide      | 20      | No peak | <0      | No peak | <0        | 0.64      | 0.00<br>6 | 0.43<br>8 | <0      |
|                      | Morphine-6-glucuronide      | 20      | No peak | <0      | No peak | <0        | <0        | No peak   | 0.08      | 0.09    |
| Tetrahydrocannabinol | THC-COOH glucuronide        | 50      | 369.2   | 306.5   | 100     | <0        | 1.05      | <0        | 0.72      | 1.034   |

Sat\* means saturation.

**Table S6** Data for methadone/metabolite in the 10 patient serum samples measured by LC-MS/MS from ARUP laboratories and the integrated CV-Chip device. Unit for the data is ng/mL.

| <b>Sample #</b> | <b>Methadone (ng/mL)</b> | <b>Metabolite (ng/mL)</b> | <b>Age</b> | <b>Sex</b> | <b>On-Chip result</b> |
|-----------------|--------------------------|---------------------------|------------|------------|-----------------------|
| 29              | 963                      | 153                       | 28         | F          | 912±58                |
| 30              | 524                      | 76                        | 28         | F          | 490±21                |
| 31              | 271                      | 25                        | 38         | F          | 285±12                |
| 32              | 520                      | 124                       | 22         | F          | 585±45                |
| 33              | 298                      | 41                        | 36         | F          | 272±23                |
| 34              | 911                      | 84                        | 29         | F          | 985±66                |
| 35              | 1313                     | 160                       | 29         | F          | 1454±89               |
| 36              | 434                      | 43                        | 54         | M          | 412±17                |
| 37              | 675                      | 75                        | 54         | M          | 625±35                |
| 38              | 1451                     | 226                       | 53         | F          | 1381±101              |

**Table S7.** A comparison between the on-chip results and the LC-MS/MS method for all the tested samples.

|                        |                 | <b>LC-MS/MS results</b> |                         |
|------------------------|-----------------|-------------------------|-------------------------|
|                        |                 | <b>Positive</b>         | <b>Negative</b>         |
| <b>On chip results</b> | <b>Positive</b> | True positive<br>(N=47) | False positive<br>(N=0) |
|                        | <b>Negative</b> | False negative<br>(N=3) | True negative<br>(N=28) |

**Movie S1** Time-lapse recording of bubbles induced by nitrogen gas generated from the reaction of luminol and  $\text{H}_2\text{O}_2$ , with HRP as the catalyst.

<https://drive.google.com/open?id=0B6Ple8oWxMUvVTBxZDU3ZjZMTVU>

**Movie S2** Time-lapse recording of bubbles induced by oxygen gas generated from the decomposition of  $\text{H}_2\text{O}_2$ , with PtNPs as the catalyst.

<https://drive.google.com/open?id=0B6Ple8oWxMUvWEZpVzhwMzFMMjg>
